# Supplementary material
Source: publisher figshare collection journal article supplement (https://tandf.figshare.com/articles/dataset/_/3841170)
Supplement: Supplementary file 1 [file 2]

Archive with 2 entries (2 files):
- KRNB_A_1236171_Supplementary_Figure1.pdf
- KRNB_A_1236171_Supplementary_Information.pdf
