# Supplementary material
Source: publisher figshare collection journal article supplement (https://tandf.figshare.com/articles/dataset/_/3841170)
Supplement: Supplementary file 1 [file 2 › KRNB_A_1236171_Supplementary_Information.pdf]

## Supplementary Information

### Statistical methods

#### Datasets

We used data from five previously published experiments with *S. cerevisiae* for which the values of mRNA amount (RA), mRNA synthesis rate (TR) and mRNA degradation rate constant (kd) for most yeast genes were experimentally obtained and/or calculated.<sup>29-33</sup> These non-steady state conditions corresponded to several stress conditions in both wild-type and mutant strains. Supplementary Table I summarizes the studied conditions and sampling points.

#### Estimation of instantaneous Growth Rate (iGR)

The instantaneous GR can be predicted from the gene expression data of several signature genes using the algorithm developed by Airolidi *et al.*<sup>7</sup> For this purpose, we used the experimentally obtained mRNA amount (RA) values from published studies.<sup>29-33</sup> First of all, data from each sampling point were relativized to the corresponding value at the initial time (t0) and log<sub>2</sub> transformed. The transformed data were loaded on the web server (<http://function.princeton.edu/growthrate/>) to estimate the iGR. Since the real GR values at t0 might be known, the relative values determined by the algorithm were converted into values of absolute iGR values.

As described in the papers from which the data were taken, only RA and TR can be obtained at the specific sampling time, whereas kd values were estimated for different times as described in.<sup>13</sup> Since iGR can be estimated only using RA values, we need a different method to estimate

the iGR that corresponds to the sampling points of kd. To this end, an interpolation of the iGR values for RA and TR was made, and the estimated iGR values for the kd sampling points were obtained. This interpolation was not used for the YPD-Gal experiment,<sup>33</sup> because, in this case, the sampling points for TR, RA and kd were the same.

## **Global comparisons**

For all five experiments, the median TR, RA and kd of each sampling (or interpolated) point was plotted *versus* the iGR of the same sampling point. We did not use the t0 time point from the original datasets because cells were not under any stress response. We plotted the median values of the different variables (TR, RA or kd) for each stress point (relative to t0). Data were normalized by the *normalizebetween arrays* function.<sup>36</sup>

## **Functionally-related gene groups analyses**

In order to look for distinct gene strategies for different functionally-related gene categories, we ran a supervised analysis by plotting relative median values to t0 for each sampling point for the different stresses against the estimated iGR. We plotted the values for Ribosome Biogenesis (GO:0042254), and Stress-induced genes (ESR-up from ref. 9).

**Supplementary Figure S1.- Predicted instantaneous growth rates (iGR) for the stress responses analyzed in this study.**

iGR were calculated as explained in the Methods section. Graphs show the time plots of the iGR after stress. Note that the time scale in YPD-YPGal stress is longer than the rest. All the stress responses show a drop in iGR with time.

**Supplementary Table I.** List of the samples used for the statistical analyses shown in Figures 1, 2 and Supplementary S1, showing the predicted instantaneous growth rate (iGR)

| Stress type | Sampling time (min) | iGR   |
|-------------|---------------------|-------|
| Alkaline    | 0                   | 0.415 |
| Alkaline    | 6                   | 0.384 |
| Alkaline    | 13                  | 0.348 |
| Alkaline    | 20                  | 0.327 |
| Alkaline    | 30                  | 0.357 |
| Alkaline    | 40                  | 0.366 |
| Alkaline    | 58                  | 0.4   |
| Oxidative   | 0                   | 0.318 |
| Oxidative   | 7                   | 0.302 |
| Oxidative   | 16                  | 0.254 |
| Oxidative   | 26                  | 0.221 |
| Oxidative   | 41                  | 0.209 |
| Oxidative   | 71                  | 0.228 |

|                        |     |       |
|------------------------|-----|-------|
| Thermic                | 0   | 0.318 |
| Thermic                | 4   | 0.282 |
| Thermic                | 11  | 0.226 |
| Thermic                | 16  | 0.188 |
| Thermic                | 26  | 0.107 |
| Thermic                | 40  | 0.102 |
| YPD-YPGal              | 0   | 0.468 |
| YPD-YPGal              | 5   | 0.47  |
| YPD-YPGal              | 120 | 0.313 |
| YPD-YPGal              | 360 | 0.374 |
| YPD-YPGal              | 450 | 0.396 |
| YPD-YPGal              | 850 | 0.34  |
| Osmotic K wt           | 0   | 0.318 |
| Osmotic K wt           | 8   | 0.289 |
| Osmotic K wt           | 15  | 0.263 |
| Osmotic K wt           | 30  | 0.207 |
| Osmotic K wt           | 45  | 0.196 |
| Osmotic K <i>cbc1Δ</i> | 0   | 0.326 |
| Osmotic K <i>cbc1Δ</i> | 8   | 0.326 |
| Osmotic K <i>cbc1Δ</i> | 15  | 0.303 |
| Osmotic K <i>cbc1Δ</i> | 30  | 0.227 |
| Osmotic K <i>cbc1Δ</i> | 45  | 0.172 |

---

54    **Additional reference**

55        36. Smyth GK. Stat Linear models and empirical bayes methods for assessing differential  
56        expression in microarray experiments. Appl Genet Mol Biol 2004; 3:Article3

57

58
