# Supplementary material
Source: publisher figshare collection journal article supplement (https://tandf.figshare.com/articles/dataset/_/3841170)

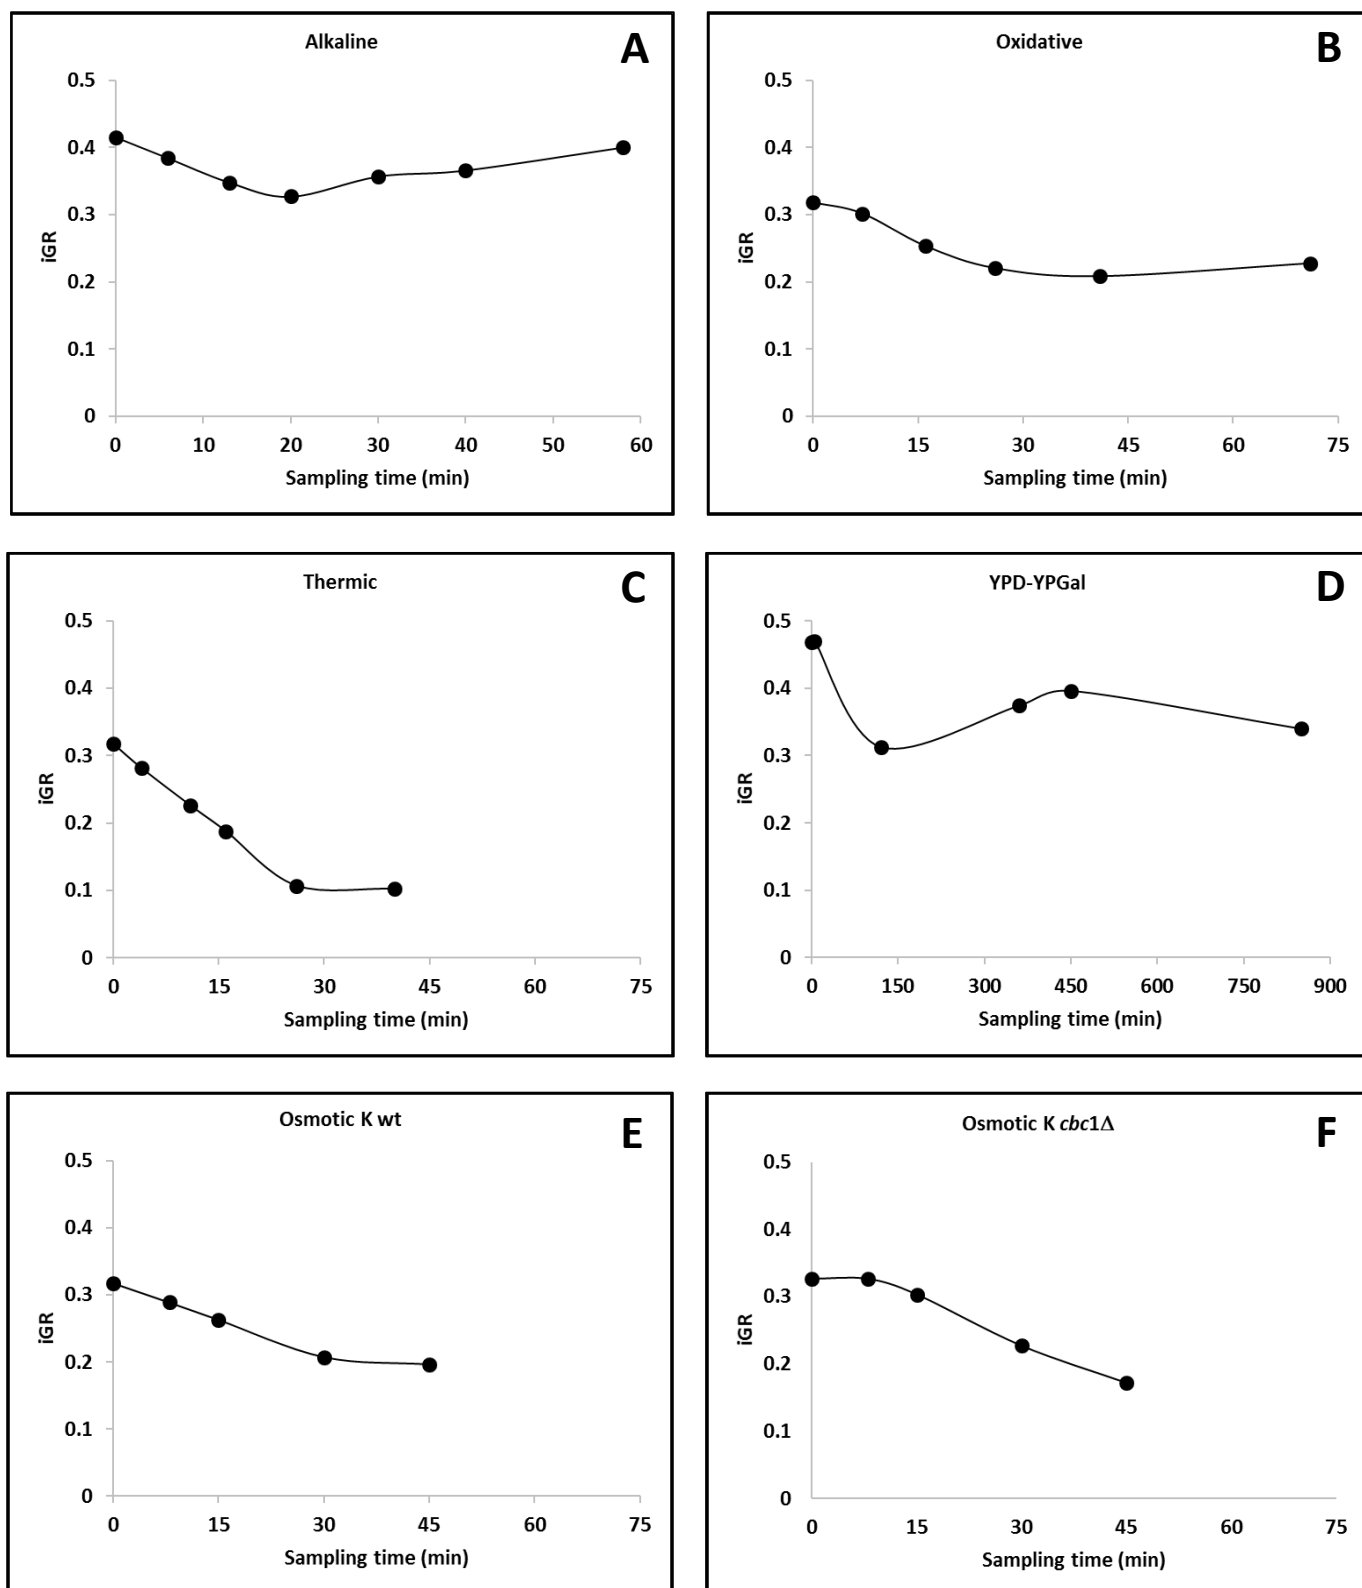

Figure S1

Supplement: Supplementary file 1 [file 2 › KRNB_A_1236171_Supplementary_Figure1.pdf]
